# Supplementary material for: Sonographic Diagnosis of Cervical Lymph Node Metastasis in Patients with Thyroid Cancer and Comparison of European and Korean Guidelines for Stratifying the Risk of Malignant Lymph Node
Source: PubMed Central journal article supplement — Korean J Radiol. 2022 Sep 16;23(11):1102–11. doi: 10.3348/kjr.2022.0358 (PMC9614289; doi:10.3348/kjr.2022.0358), 2022-09-16
Supplement: kjr-23-1102-s001.pdf [file kjr-23-1102-s001.pdf]

## SUPPLEMENT

**Supplementary Table 1. Categorization of Cervical Lymph Nodes Using Ultrasound Features according to the ETA Guideline and K-TIRADS**

| Category                     | Ultrasound Features                                                                                                                                                                                                 |
|------------------------------|---------------------------------------------------------------------------------------------------------------------------------------------------------------------------------------------------------------------|
| ETA guideline                |                                                                                                                                                                                                                     |
| Normal                       | 1) normal hilum, 2) ovoid shape & normal size*, 3) absent or hilar vascularization, 4) no suspicious feature                                                                                                        |
| Indeterminate                | Absence of a hilum and at least one of the following characteristics:<br>1) round shape, 2) increased short axis $\geq 8$ mm in level II and $\geq 5$ mm in levels III and IV, 3) increased central vascularization |
| Suspicious for malignancy    | At least one of the following characteristics:<br>1) microcalcifications, 2) partially cystic appearance, 3) peripheral or diffusely increased vascularization, 4) hyperechoic tissue looking like thyroid          |
| K-TIRADS                     |                                                                                                                                                                                                                     |
| Probably benign <sup>†</sup> | Echogenic hilum or hilar vascularity                                                                                                                                                                                |
| Indeterminate                | Loss of echogenic hilum and hilar vascularity                                                                                                                                                                       |
| Suspicious                   | Any of four suspicious features:<br>1) cystic change, 2) echogenic foci (calcifications), 3) cortical hyperechogenicity (focal/diffuse), 4) abnormal vascularity (peripheral/diffuse)                               |

\*Short axis,  $< 8$  mm in level II and  $< 5$  mm in levels III and IV, <sup>†</sup>Lymph nodes with any imaging feature of echogenic hilum or hilar vascularity are considered probably benign, if there are no suspicious imaging features. ETA = European Thyroid Association, K-TIRADS = Korean Thyroid Imaging Reporting and Data System
